# Supplementary material
Source: MDPI journal article supplement (https://www.mdpi.com/2072-4292/13/2/180)
Supplement: s1 [file s1]

**Table S1.** Validation of the mean daily LST estimated by the MODIS product.

| Station name | $R^2$ | RMSE (°C) | ME (°C) |
|--------------|-------|-----------|---------|
| Xinghai      | 0.96  | 1.95      | 0.11    |
| Maduo        | 0.95  | 2.25      | -0.44   |
| Maqin        | 0.96  | 1.93      | 0.49    |
| Dari         | 0.95  | 1.95      | 0.31    |
| Henan        | 0.95  | 1.99      | 0.12    |
| Jiuzhi       | 0.95  | 1.91      | 0.54    |
| Mqu          | 0.94  | 2.03      | -0.37   |
| Zoige        | 0.92  | 2.27      | -0.33   |
| Hongyuan     | 0.92  | 2.25      | -0.46   |

**Table S2.** Comparison of the mean value of the observed and remote sensing estimated annual MTSFG at 9 meteorological stations.

| Station name | Elevation (m) | Observed mean annual MTSFG (cm) | Estimated mean annual MTSFG (cm) | ME (cm) | RMSE (cm) |
|--------------|---------------|---------------------------------|----------------------------------|---------|-----------|
| Xinhai       | 3323.2        | 138.69                          | 139.31                           | -0.62   | 15.23     |
| Maduo        | 4272.3        | 215.84                          | 210.69                           | 5.15    | 20.63     |
| Maqin        | 3719.0        | 134.65                          | 141.92                           | -7.27   | 13.32     |
| Dari         | 3967.5        | 185.49                          | 183.69                           | 1.80    | 14.86     |
| Henan        | 3500.0        | 109.70                          | 110.00                           | -0.30   | 8.52      |
| Jiuzhi       | 3628.5        | 75.49                           | 76.31                            | -0.82   | 9.19      |
| Maqu         | 3471.4        | 68.56                           | 71.11                            | -2.55   | 6.84      |
| Zoige        | 3441.4        | 64.19                           | 59.77                            | 4.42    | 18.43     |
| Hongyuan     | 3491.6        | 47.24                           | 47.85                            | -0.60   | 12.26     |

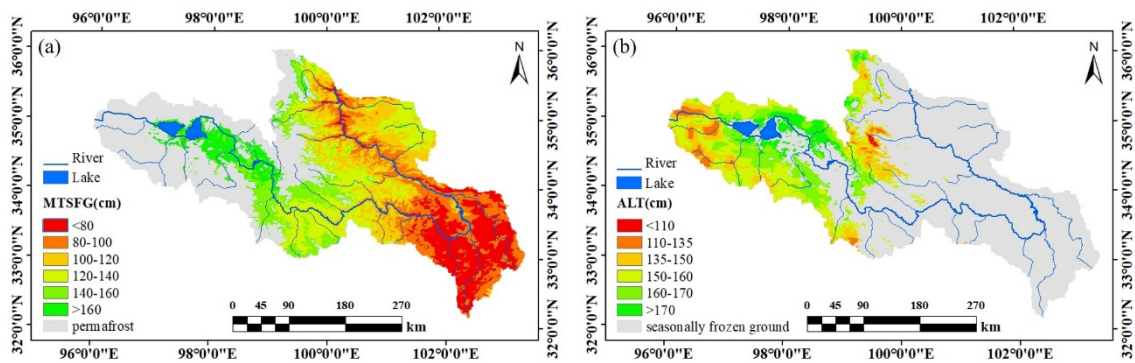**Figure S1.** Spatial distribution of the (a) maximum thickness of seasonally frozen ground (MTSFG) and (b) active layer thickness (ALT) of permafrost during the period of 2003–2019. Note: The MTSFG is determined within the distribution of seasonally frozen ground from 2003 to 2010; the ALT is determined within the distribution of permafrost from 2011 to 2019

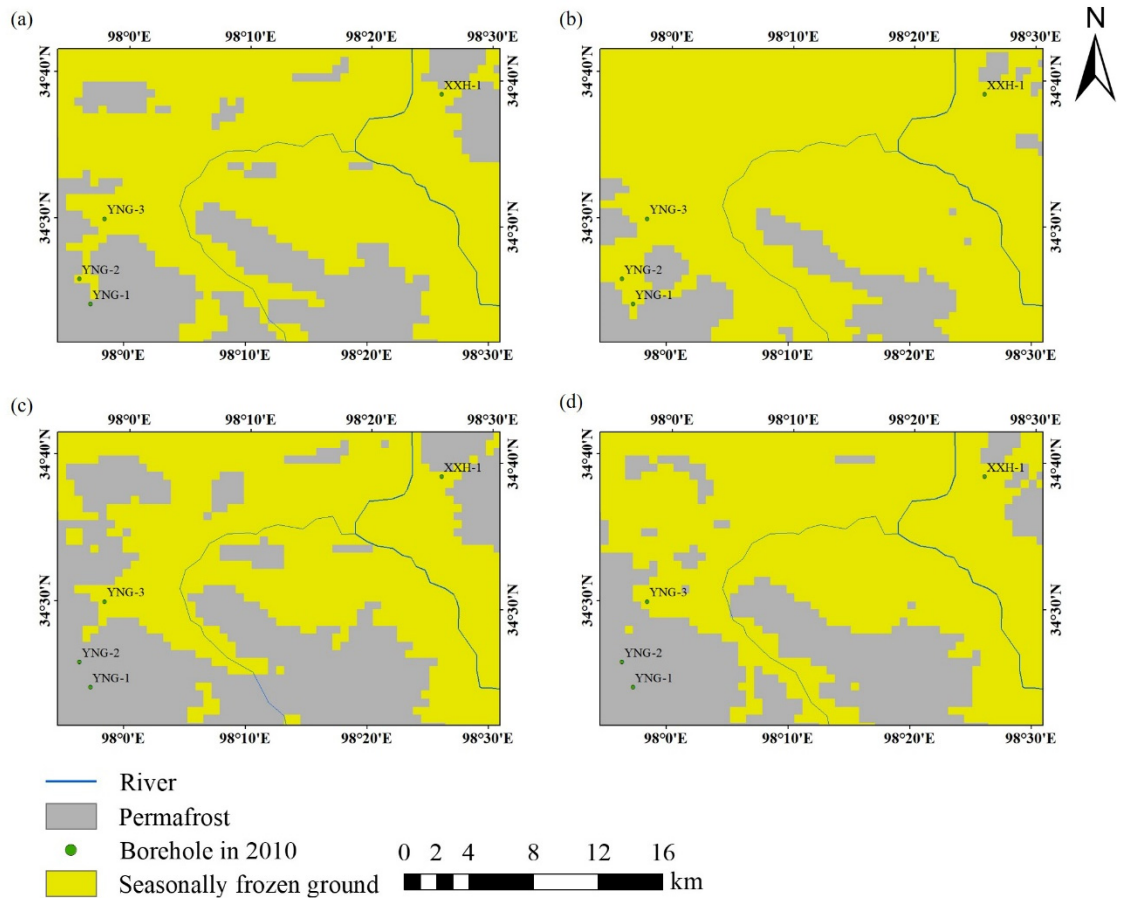

**Figure S2.** Enlarged map of the distribution of frozen soil in the period from 2003–2014 in the SRYR: (a) the normal run; (b) exp1; (c) exp2 and (d) exp3.

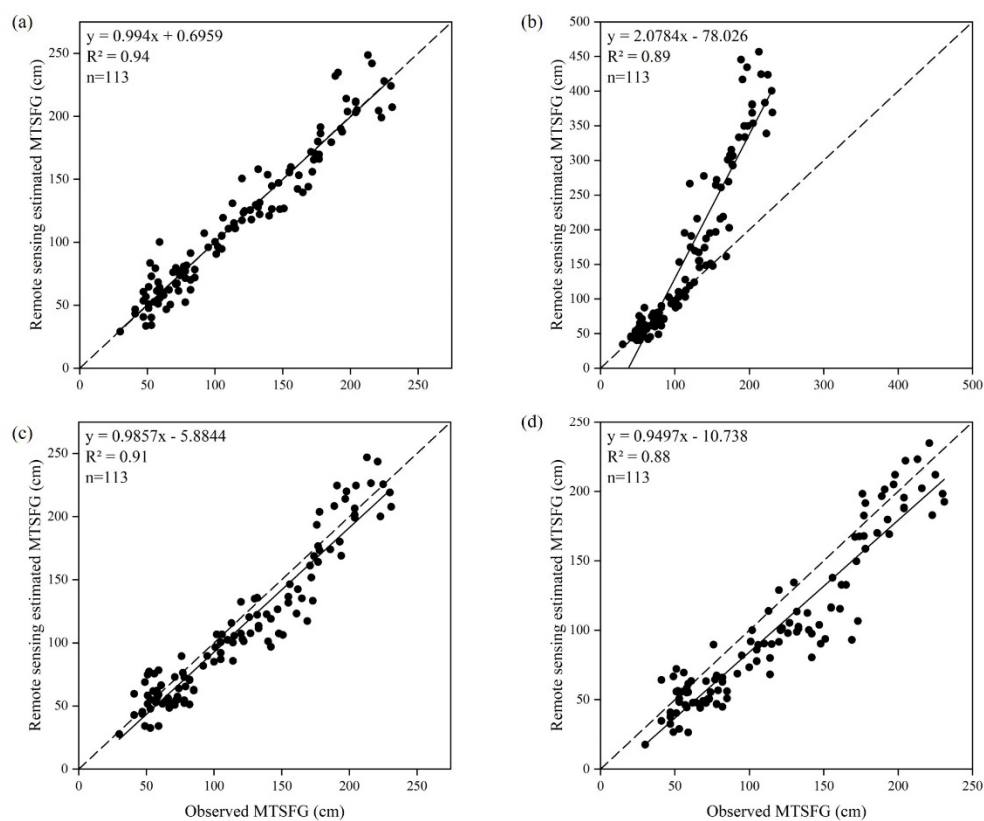

**Figure S3.** MTSFG estimated by remote sensing against observations at 9 meteorological stations: (a) the normal run; (b) exp1; (c) exp2 and (d) exp3.

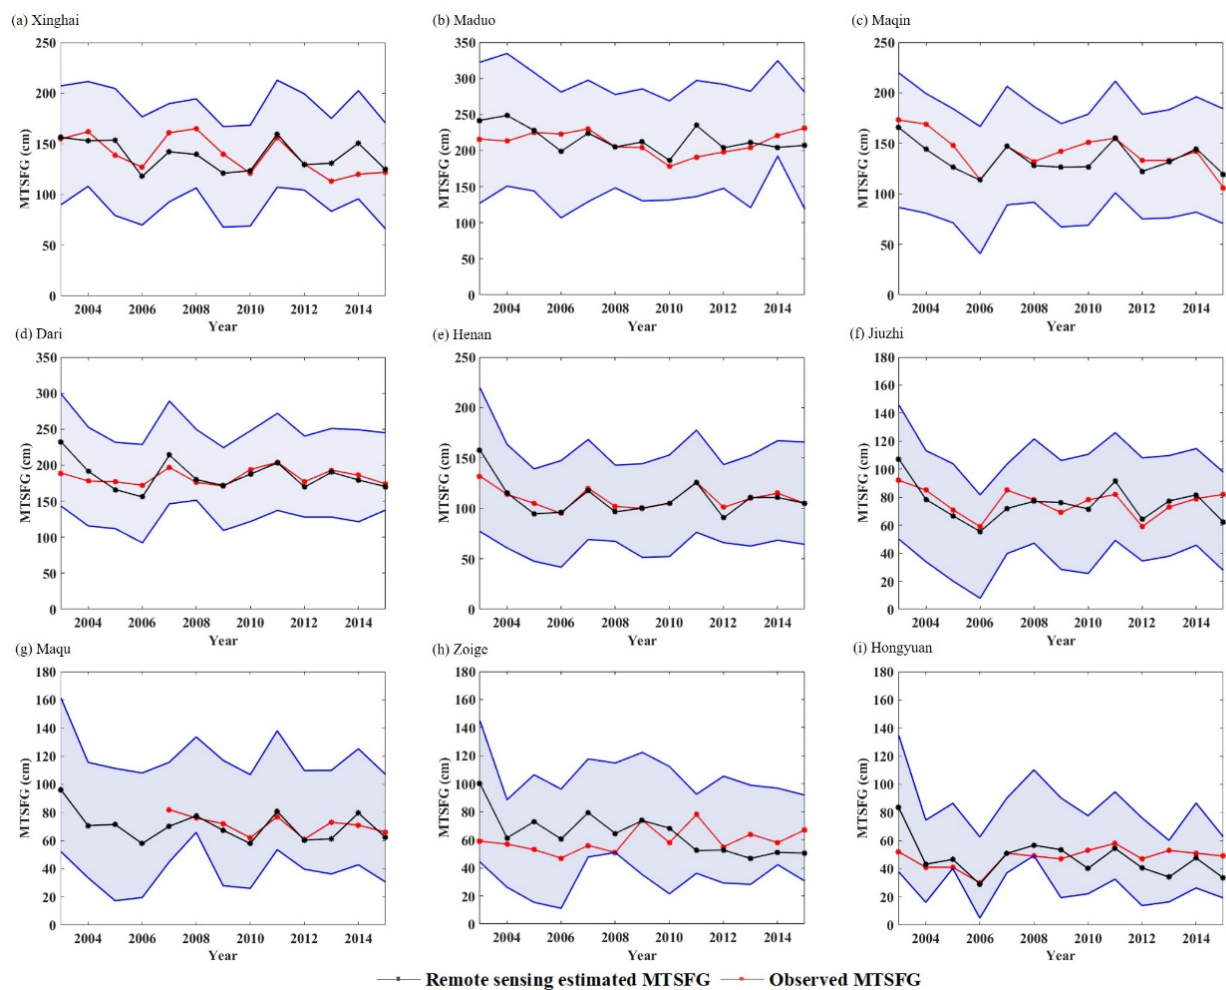

**Figure S4.** Comparison of the MTSFG estimated by remote sensing and its uncertainty band with observations at 9 meteorological stations. The regions filled by blue color is the uncertainty band of the estimated MTSFG with 95% confidence level.
